# Supplementary material for: Synergistically enhanced photocatalytic and chemotherapeutic effects of aptamer-functionalized ZnO nanoparticles towards cancer cells
Source: Royal Society of Chemistry journal article supplement (doi:10.1039/c5cp02139a), 2015-01-01
Supplement: c5cp02139a1.pdf [file c5cp02139a1.pdf]

SUPPORTING INFORMATION

**Synergistic enhanced photocatalytic and chemotherapeutic effects of aptamer-functionlized ZnO nanoparticles towards cancer cells**

Zhou Han <sup>[1],1,2</sup>, Xinhuan Wang <sup>[1],2</sup>, Chenglin Heng<sup>1,\*</sup>, Qiusen Han <sup>2</sup>, Shuanfei Cai <sup>2</sup>,  
Jingying Li <sup>2</sup>, Cui Qi <sup>2</sup>, Wei Liang <sup>3</sup>, Rong Yang <sup>2,\*</sup>, Chen Wang <sup>2</sup>

1. *Key Laboratory of Cluster Science of Ministry of Education and School of Physics, Beijing Institute of Technology, Beijing 100081, P. R.. China*
2. *CAS Key Lab for Biological Effects of Nanomaterials and Nanosafety, National Center for Nanoscience and Technology, Beijing, 100190, P. R. China.*
3. *Institute of biophysics, National Laboratory of Biomacromolecules, Beijing, China*

\* Corresponding Author: [hengcl@bit.edu.cn](mailto:hengcl@bit.edu.cn); [yangr@nanoctr.cn](mailto:yangr@nanoctr.cn)

<sup>[1]</sup> These authors contributed equally to this work.

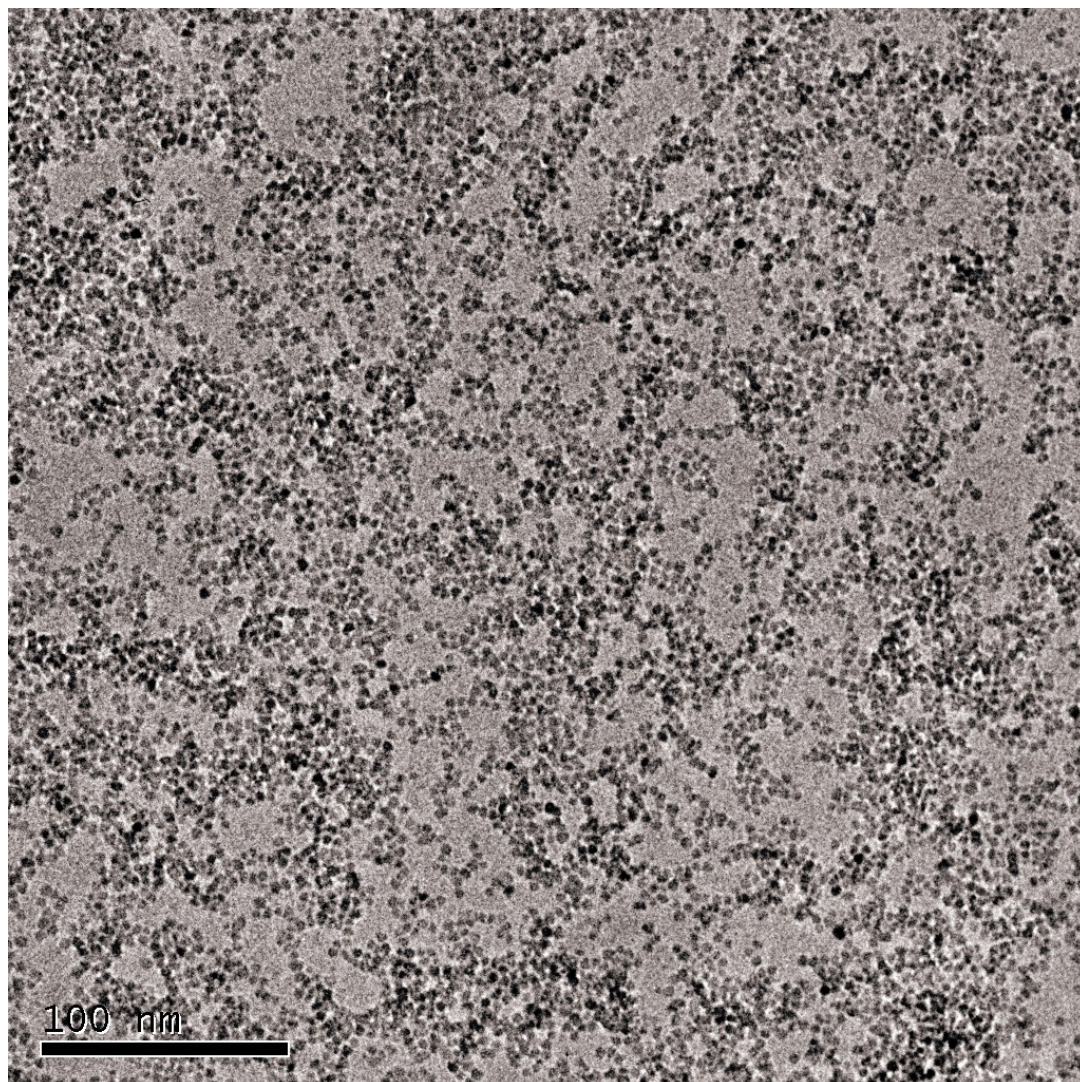

**Fig. S1.** TEM image of ZnO nanoparticles. Scale bar is 100 nm.

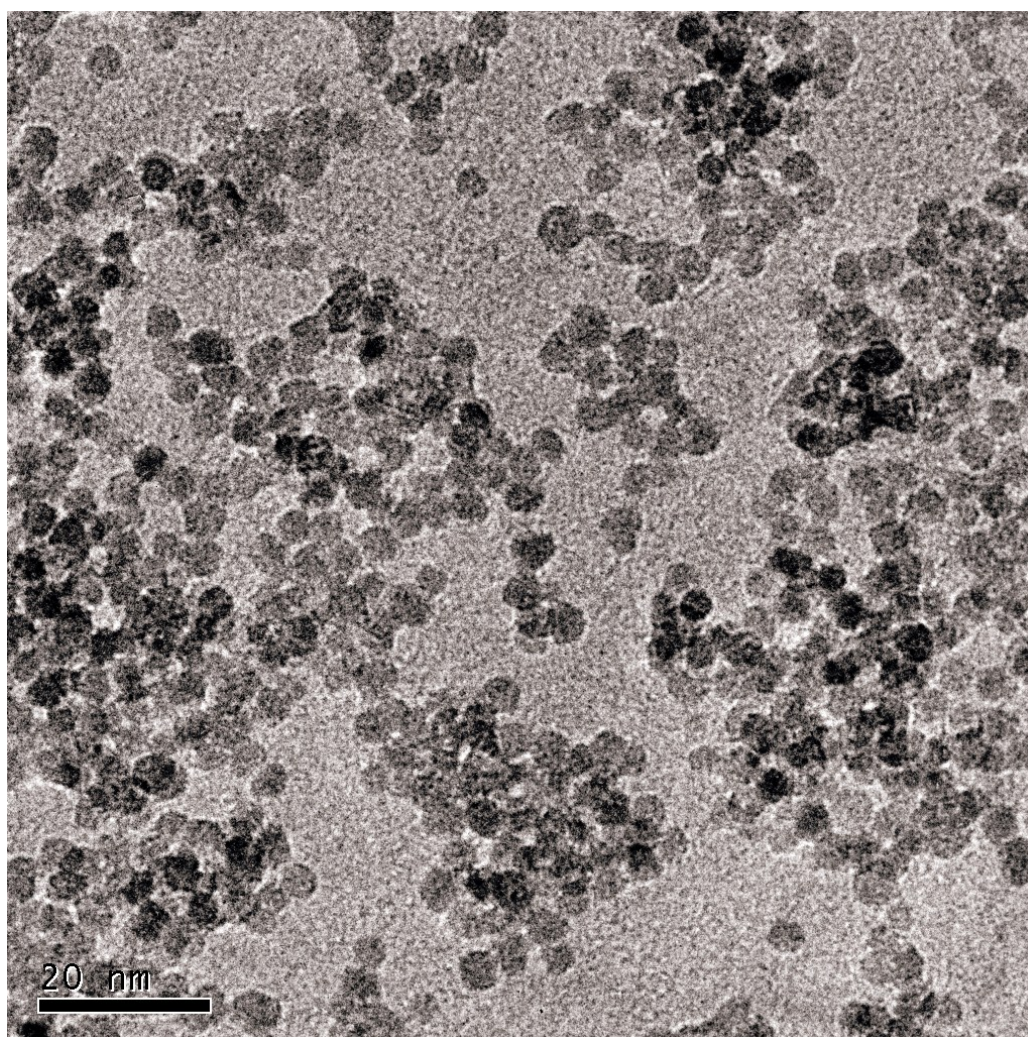

**Fig. S2.** TEM images of ZnO nanoparticles. Scale bar is 20 nm.

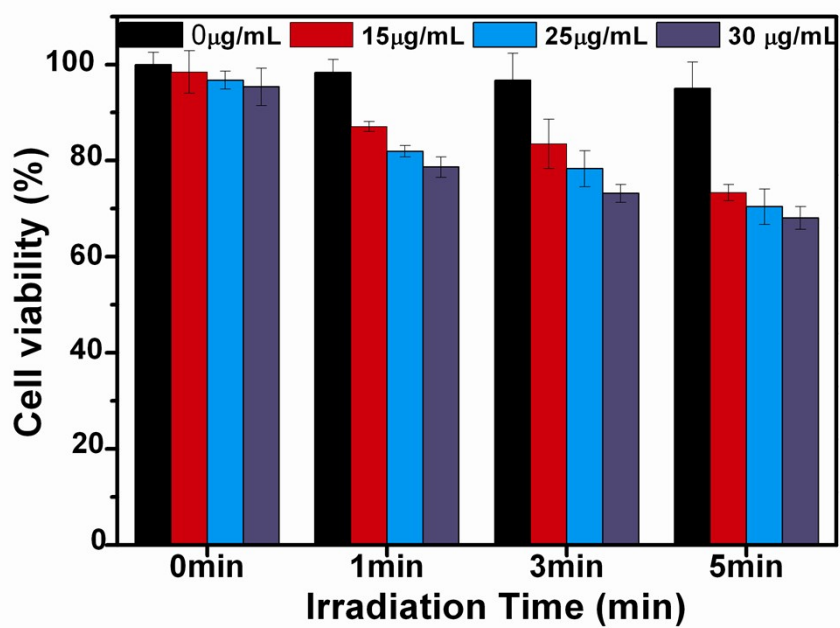

**Fig. S3.** The MCF-7 cell viability after treated with APTES-ZnO NPs and UV irradiation. (The concentrations of NPs were 0, 15, 25, 30µg/ml; The irradiation time were 0, 1, 3, 5 min.)

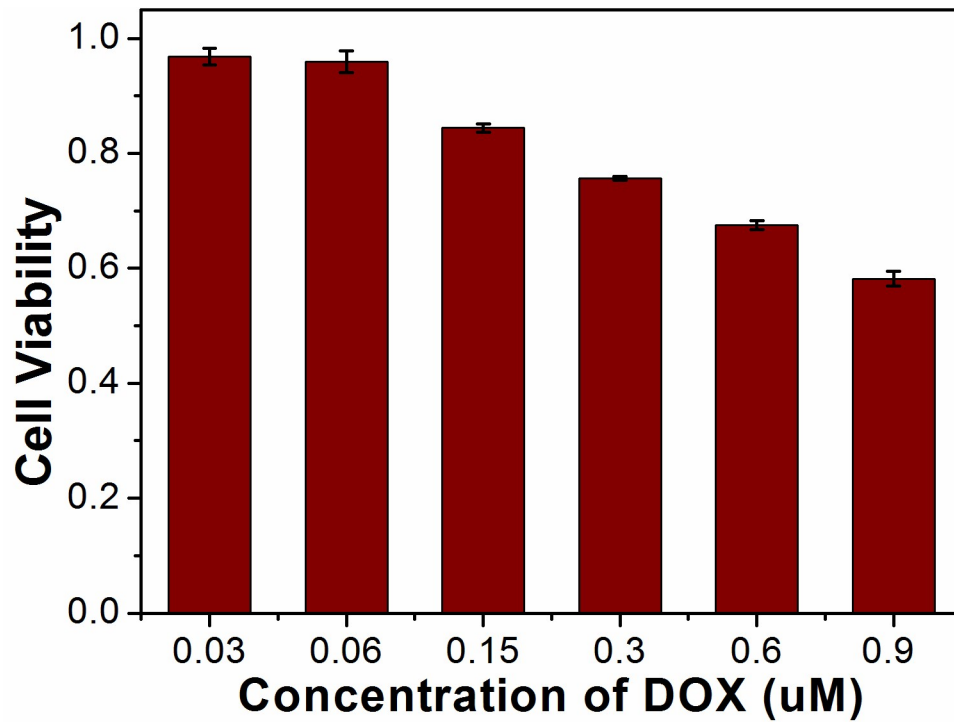

**Fig. S4.** The MCF-7 cell viability after treated with Dox of different concentrations.

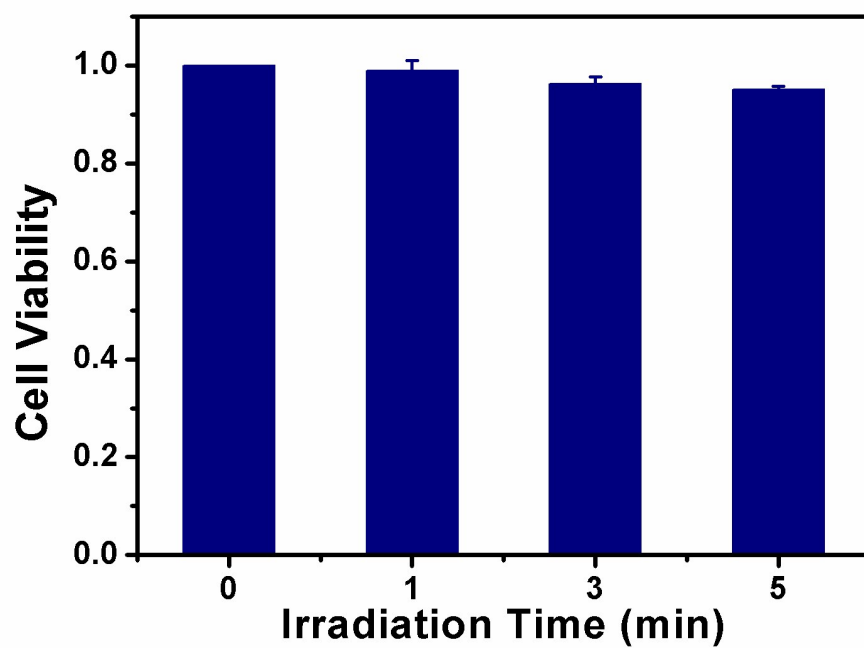

**Fig. S5.** The HEK 293 cell viability with and without UV irradiation.

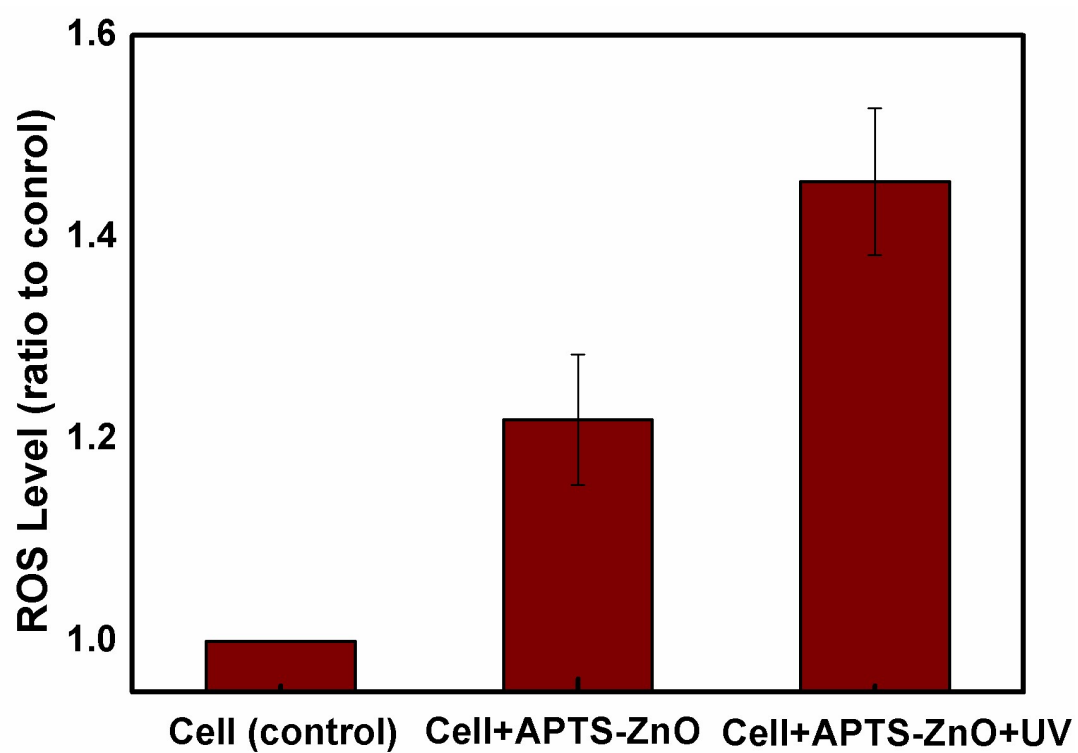

**Fig. S6** ROS (reactive oxygen species) level of 30  $\mu\text{g/mL}$  APTES-ZnO NPs to MCF-7 cells before and after UV irradiation for 1 min.

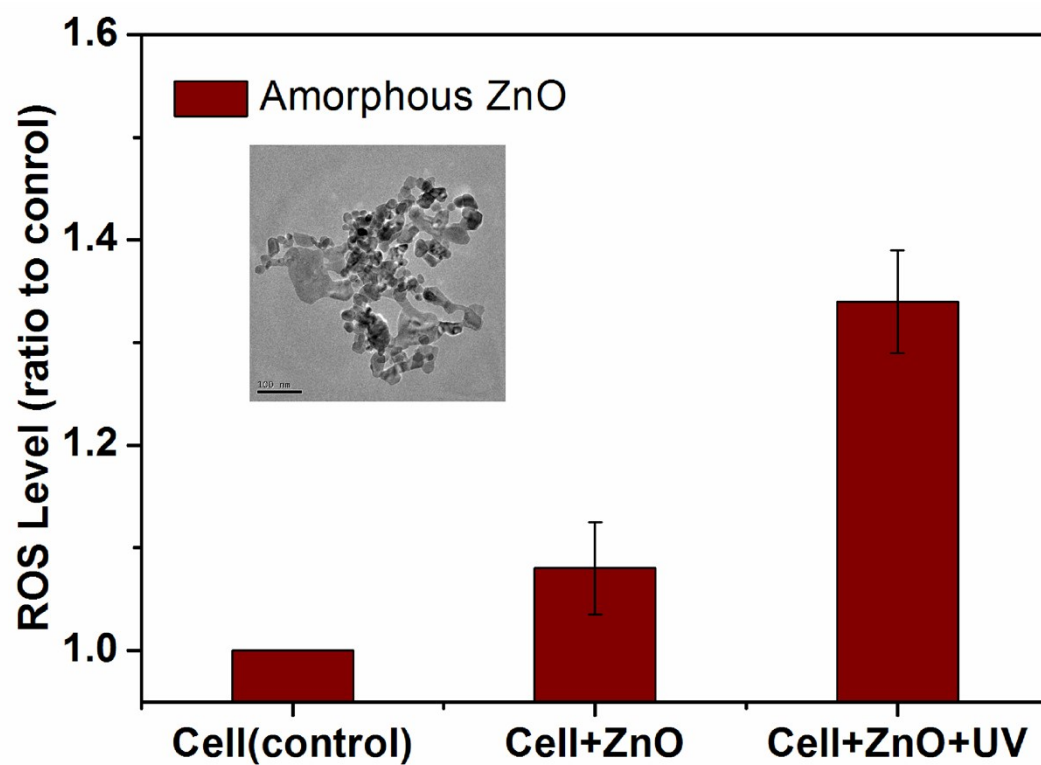

**Fig. S7** ROS level of 30  $\mu\text{g/mL}$  amorphous ZnO NPs to MCF-7 cells before and after UV irradiation for 1 min. Inset is TEM image of amorphous ZnO NPs.
